# Supplementary material for: A high performance green-sensitive organic photodiode comprising a bulk heterojunction of dimethyl-quinacridone and dicyanovinyl terthiophene
Source: Royal Society of Chemistry journal article supplement (doi:10.1039/c3tc00809f), 2013-01-01
Supplement: c3tc00809f.pdf [file c3tc00809f.pdf]

## Electronic Supplementary Information

### High performance green-sensitive organic photodiode comprising a bulk heterojunction of dimethyl-quinacridone and dicyanovinyl terthiophene

By Kwang-Hee Lee,<sup>a,b</sup> Dong-Seok Leem,<sup>a</sup> Soohwan Sul,<sup>a</sup> Kyung-Bae Park,<sup>a</sup>  
Seon-Jeong Lim,<sup>a</sup> Hyouksoo Han,<sup>a</sup> Kyu-Sik Kim,<sup>\*a</sup> Yong Wan Jin,<sup>a</sup> Sangyoon Lee,<sup>a</sup>  
and Soo Young Park<sup>\*b</sup>

<sup>a</sup> Display device Lab. Samsung Advanced Institute of Technology, Yongin 446-712, Republic of Korea.

Fax: +82-31-280-9473; Tel: +82-31-280-6714; E-mail: [kyuskim@samsung.com](mailto:kyuskim@samsung.com)

<sup>b</sup> Creative Research Initiative Center for Supramolecular Optoelectronic Materials and WCU Hybrid

Materials Program, Department of Materials Science and Engineering, Seoul National University, 1

Gwanak-ro, Gwanak-gu, Seoul 151-744 Korea. Fax: +82-2-886-8331; Tel: +82-2-880-8327; E-mail:

[parksy@snu.ac.kr](mailto:parksy@snu.ac.kr)

#### Content:

|                                                                                    |    |
|------------------------------------------------------------------------------------|----|
| 1. Atomic force microscopic topography of two neat films and three BHJ films ..... | S2 |
|------------------------------------------------------------------------------------|----|

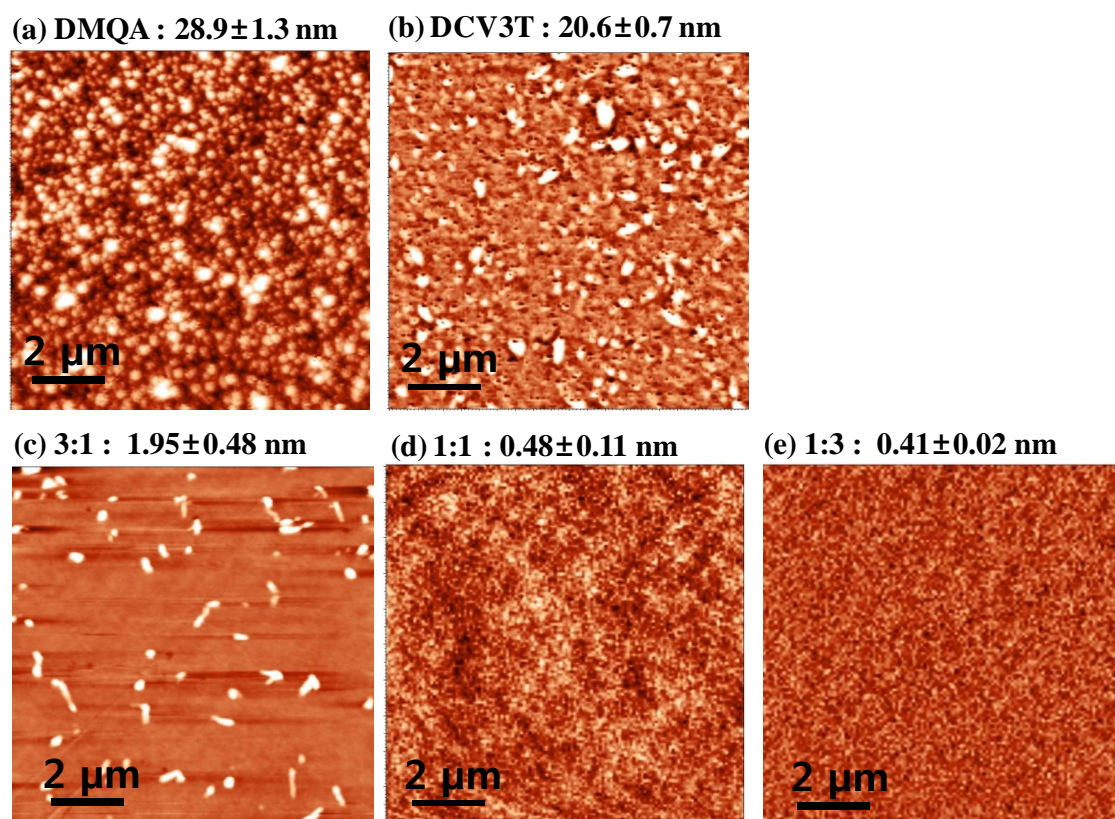

**Figure S1.** Atomic force microscopic topography of (a) neat DMQA, (b) neat DCV3T, (c) 3:1 BHJ, (d)

1:1 BHJ, and (e) 1:3 BHJ films. The field area of each film is  $10\mu\text{m} \times 10\mu\text{m}$ .
